# Supplementary material
Source: PubMed Central journal article supplement (PMC4251710)
Supplement: NIHMS620866-supplement-01.pdf [file NIHMS620866-supplement-01.pdf]

**SUPPLEMENTARY:**

| <b>Table S1 Polymerase Chain Primers and Extension Primers</b> |                                        |
|----------------------------------------------------------------|----------------------------------------|
| Mutation                                                       | Primer                                 |
| Polymerase Chain Reaction                                      |                                        |
| BRAF_1799_PCR_F                                                | 5'-acgttggatgTCTTCATGAAGACCTCACAG-3'   |
| BRAF_1799_PCR_R                                                | 5'-acgttggatgATGGATCCAGACAACACTGTTC-3' |
| BRAF_1406G                                                     | 5'-acgttggatgTGGGCAGATTACAGTGGGAC-3'   |
| BRAF_1798G                                                     | 5'-acgttggatgATGGGACCCACTCCATCGAG-3'   |
| Extension                                                      |                                        |
| BRAF_1799_F                                                    | 5'-GGTGATTTTGGTCTAGCTACAG-3'           |
| BRAF_1799_R                                                    | 5'-CCCACTCCATCGAGATTTC-3'              |
| BRAF_1406G                                                     | 5'-CACTTTCCCTTGTAGACTGTT-3'            |
| BRAF_1798G                                                     | 5'-GTGATTTTGGTCTAGCTACA-3'             |
